# Supplementary material for: The Epidemiology of Circulating Respiratory Pathogens during the COVID-19 Pandemic
Source: PubMed Central journal article supplement — Intern Med. 2024 Mar 18;63(12):1683–7. doi: 10.2169/internalmedicine.3266-23 (PMC11239251; doi:10.2169/internalmedicine.3266-23), 2024-03-18
Supplement: 1349-7235-63-1683-s001.pdf [file 1349-7235-63-1683-s001.pdf]

**Supplemental Figure 1. Monthly detection rate of severe acute respiratory coronavirus 2**

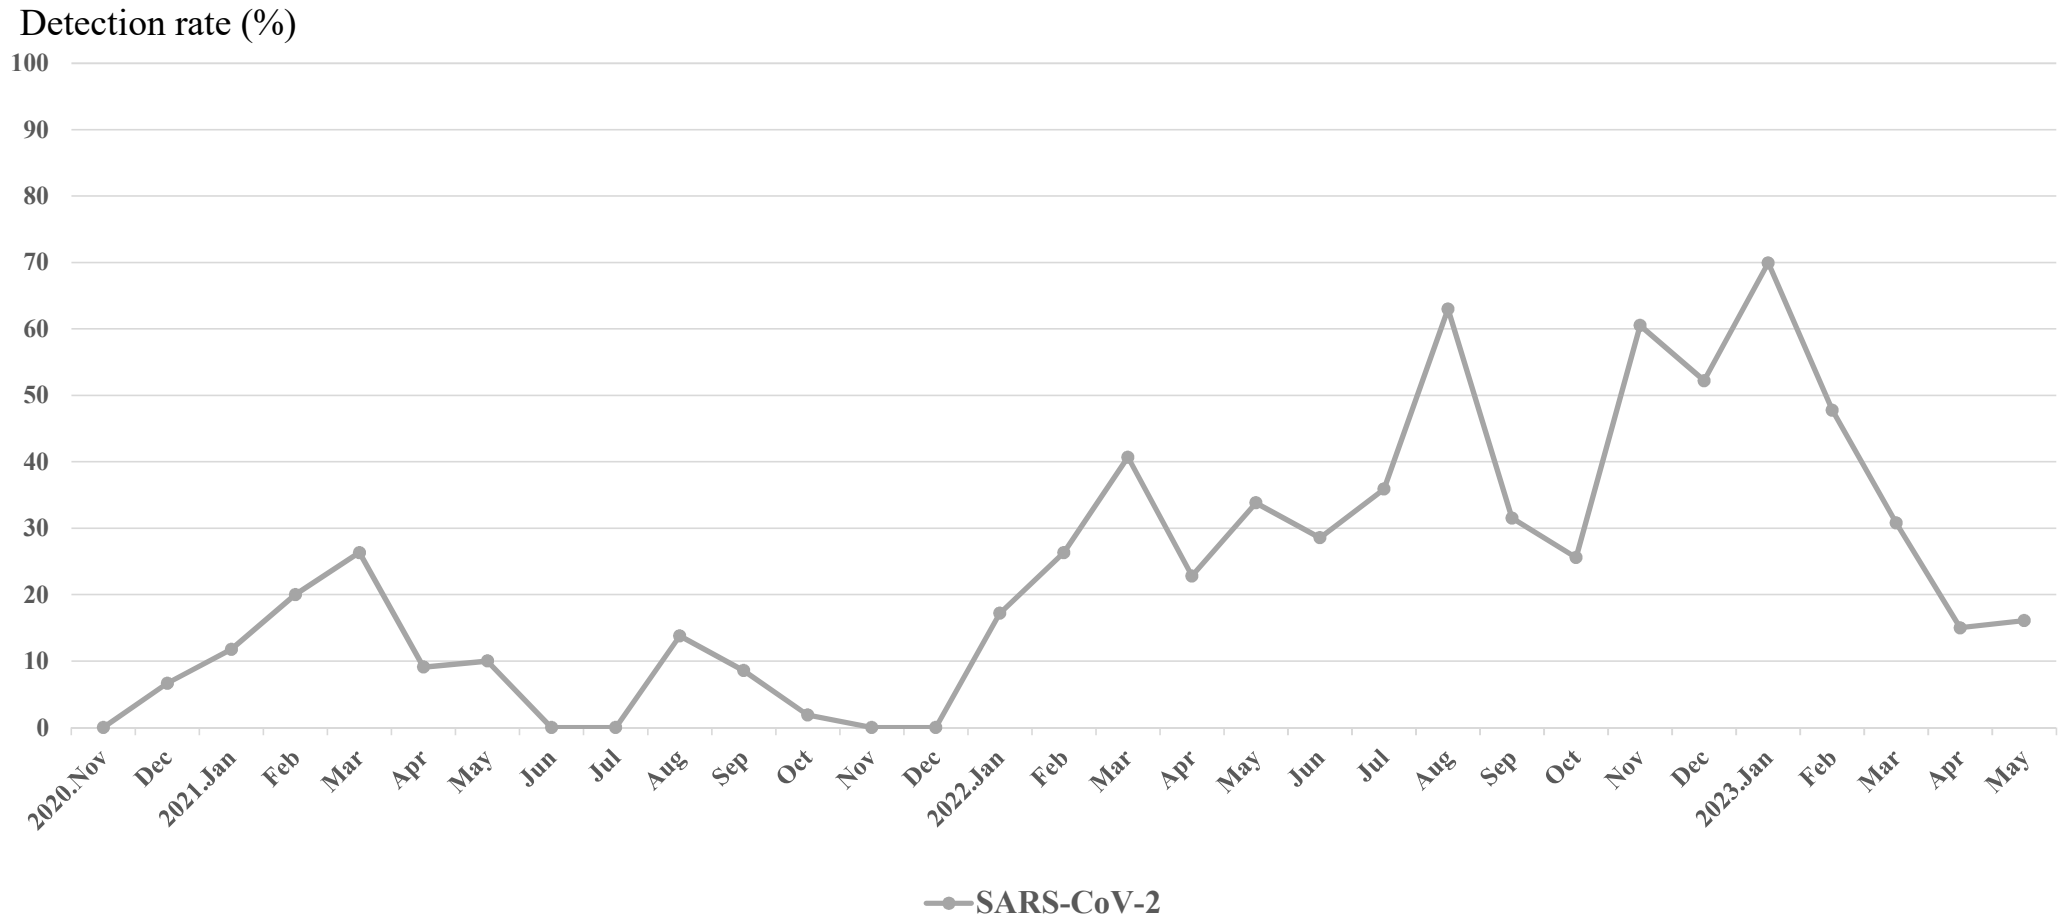

SARS-CoV-2 : Severe acute respiratory coronavirus 2
