# Supplementary figures and images for: The Epidemiology of Circulating Respiratory Pathogens during the COVID-19 Pandemic
Source: PubMed Central journal article supplement — Intern Med. 2024 Mar 18;63(12):1683–7. doi: 10.2169/internalmedicine.3266-23 (PMC11239251; doi:10.2169/internalmedicine.3266-23), 2024-03-18

**Supplemental Figure 2. Monthly detection rate of rhinoviruses/enteroviruses**

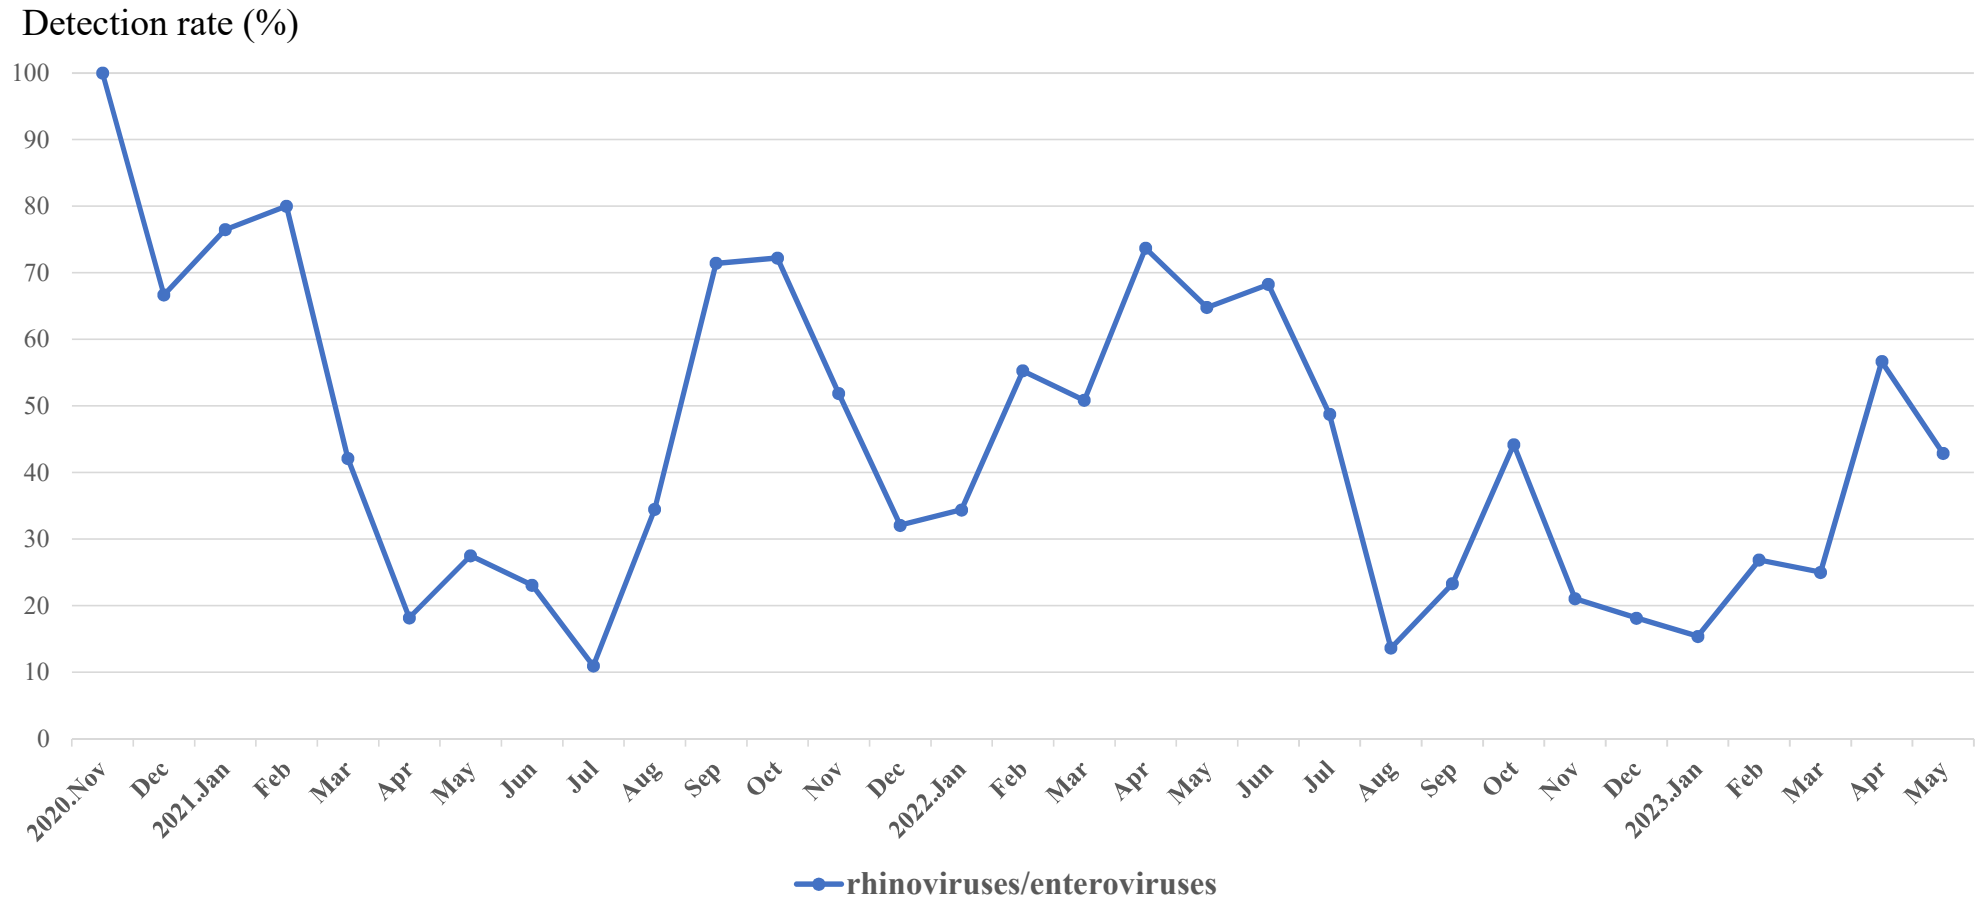

Supplement: 1349-7235-63-1683-s002.pdf [file 1349-7235-63-1683-s002.pdf]

### Supplemental Figure 3. Monthly detection rate of Respiratory syncytial virus

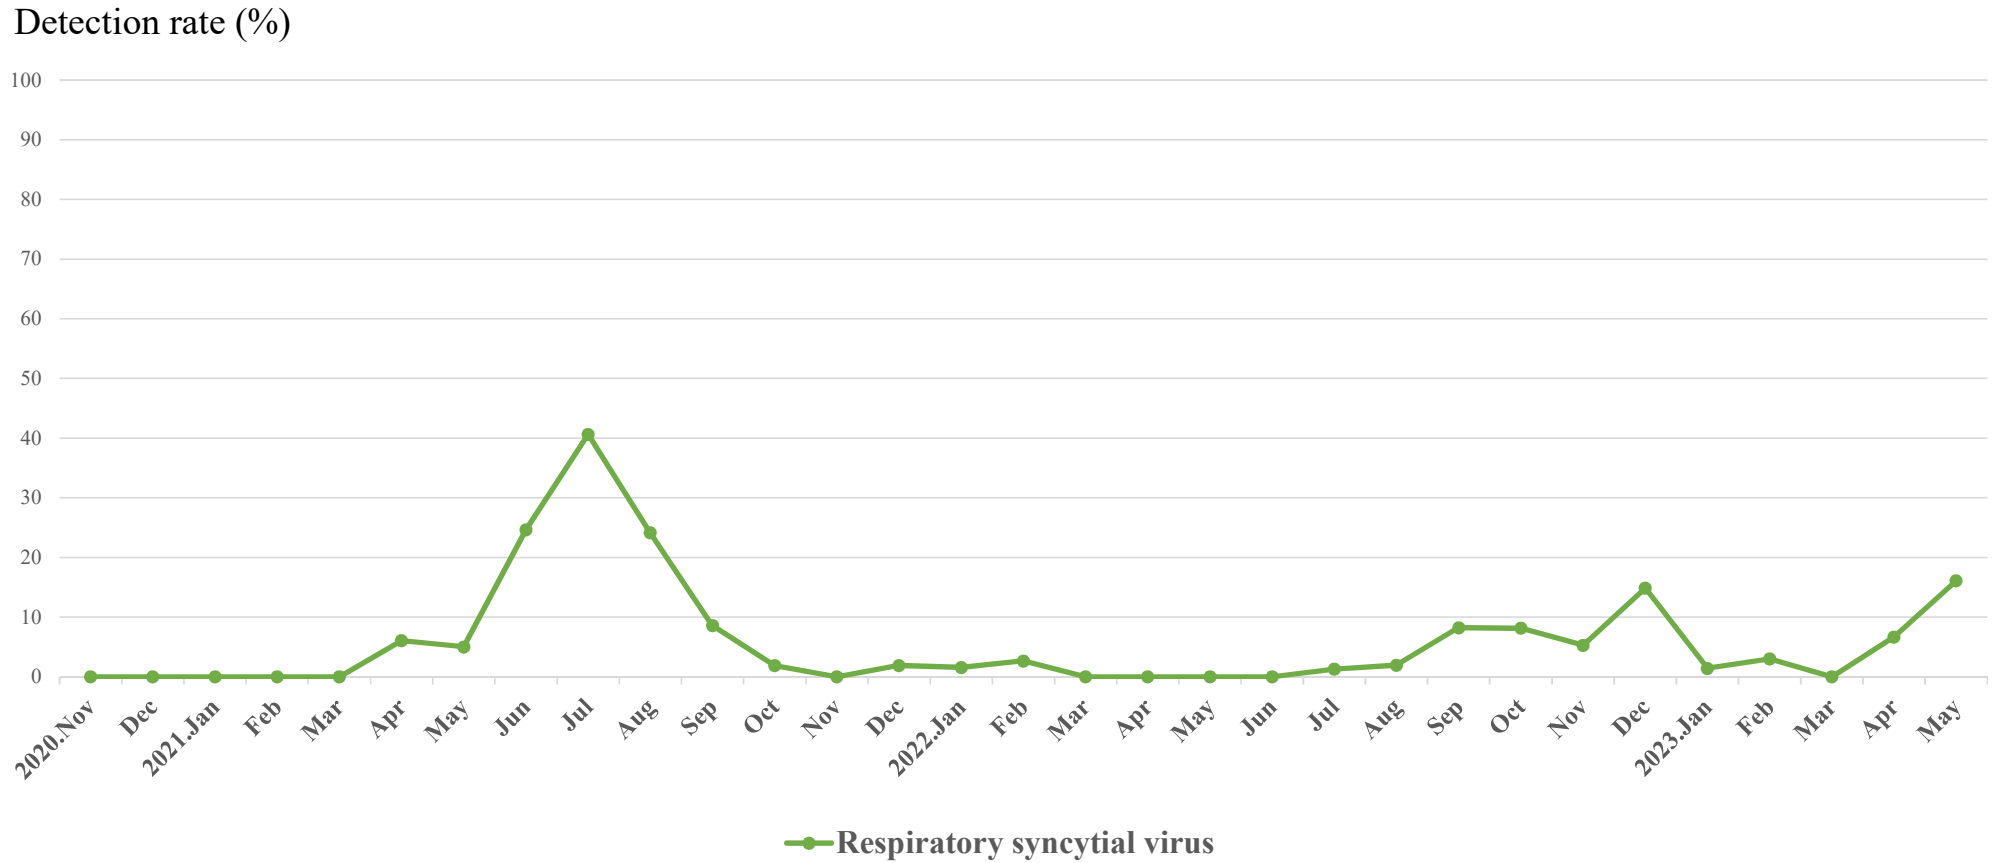

Supplement: 1349-7235-63-1683-s003.pdf [file 1349-7235-63-1683-s003.pdf]

### Supplemental Figure 4. Monthly detection rate of Adenovirus

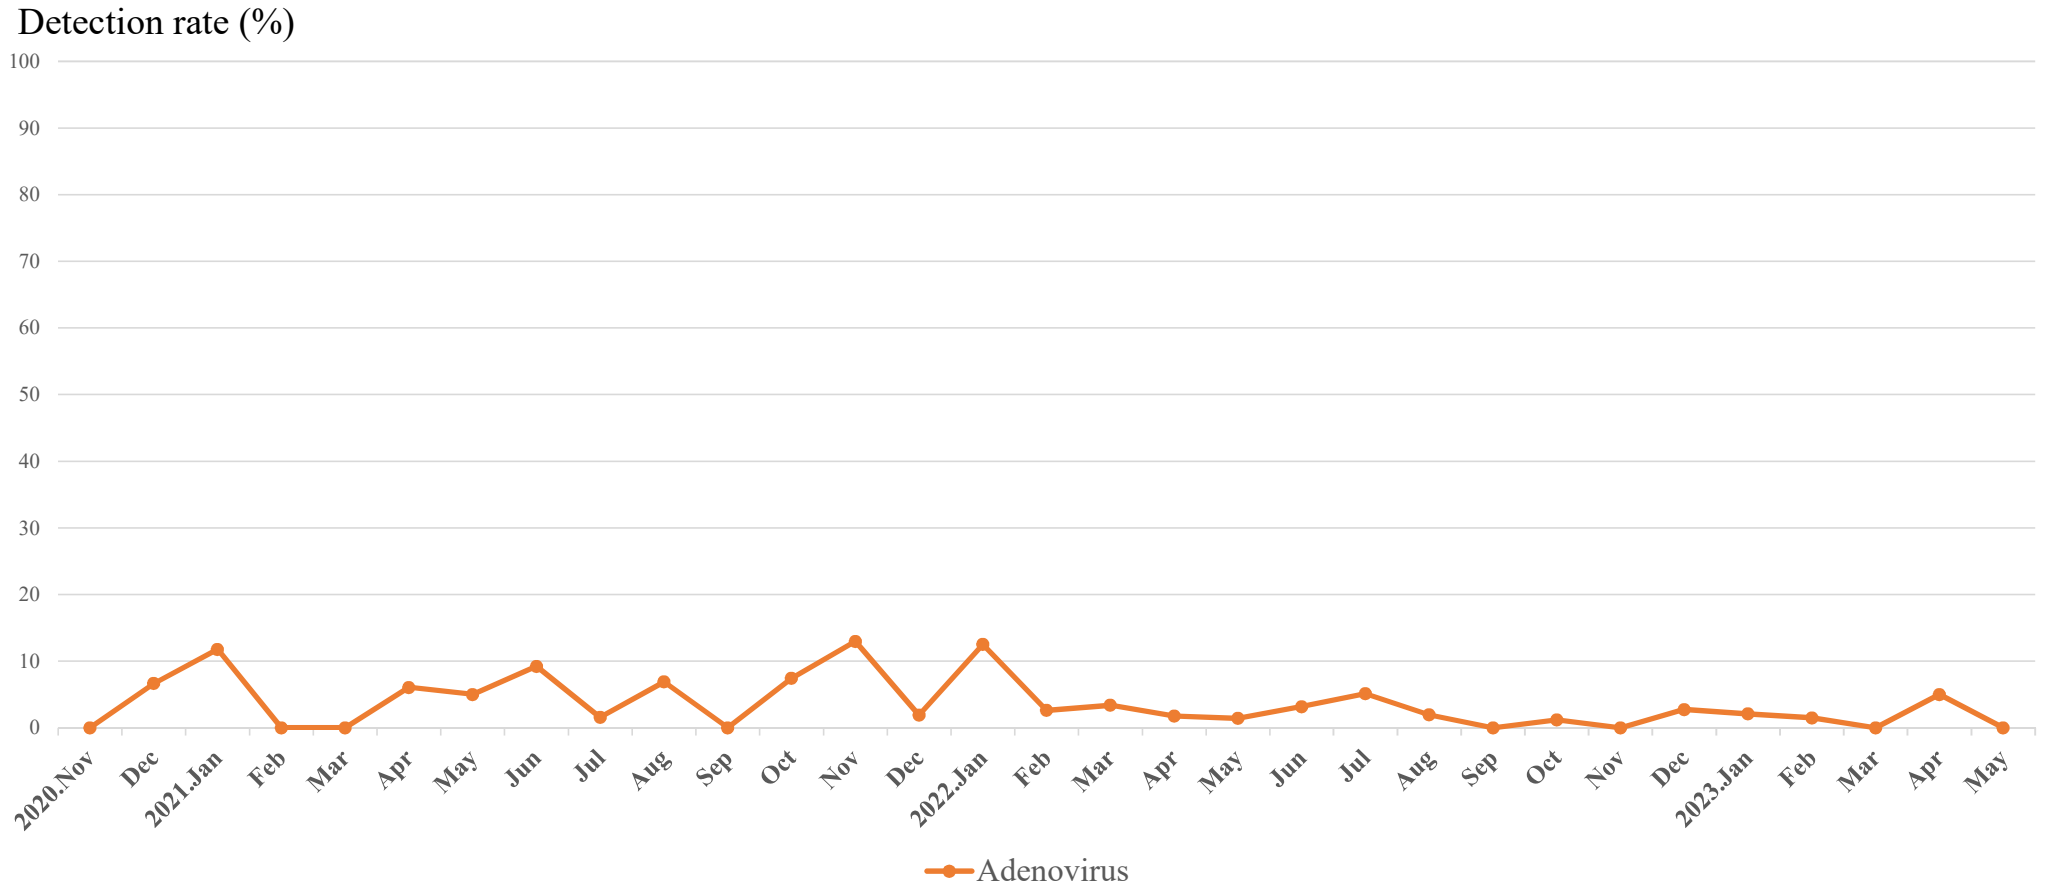

Supplement: 1349-7235-63-1683-s004.pdf [file 1349-7235-63-1683-s004.pdf]

### Supplemental Figure 5. Monthly detection rate of human metapneumovirus

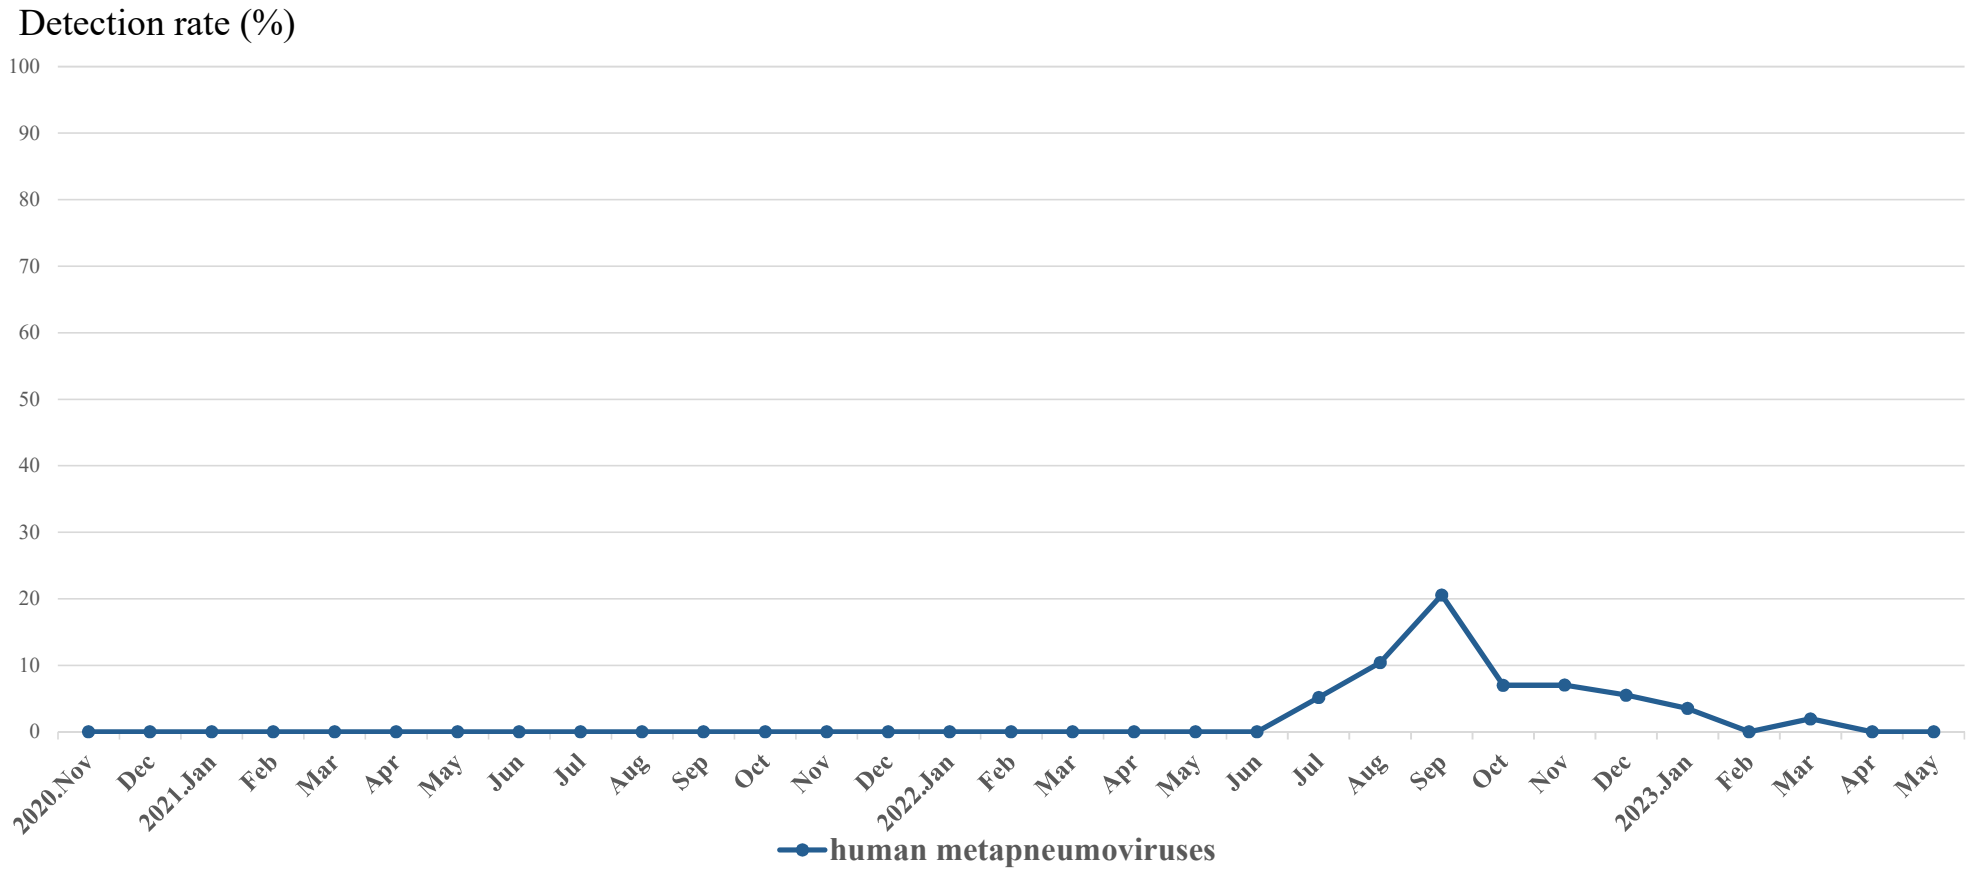

Supplement: 1349-7235-63-1683-s005.pdf [file 1349-7235-63-1683-s005.pdf]

## Supplemental Figure 6. Monthly detection rate of parainfluenza viruses 1

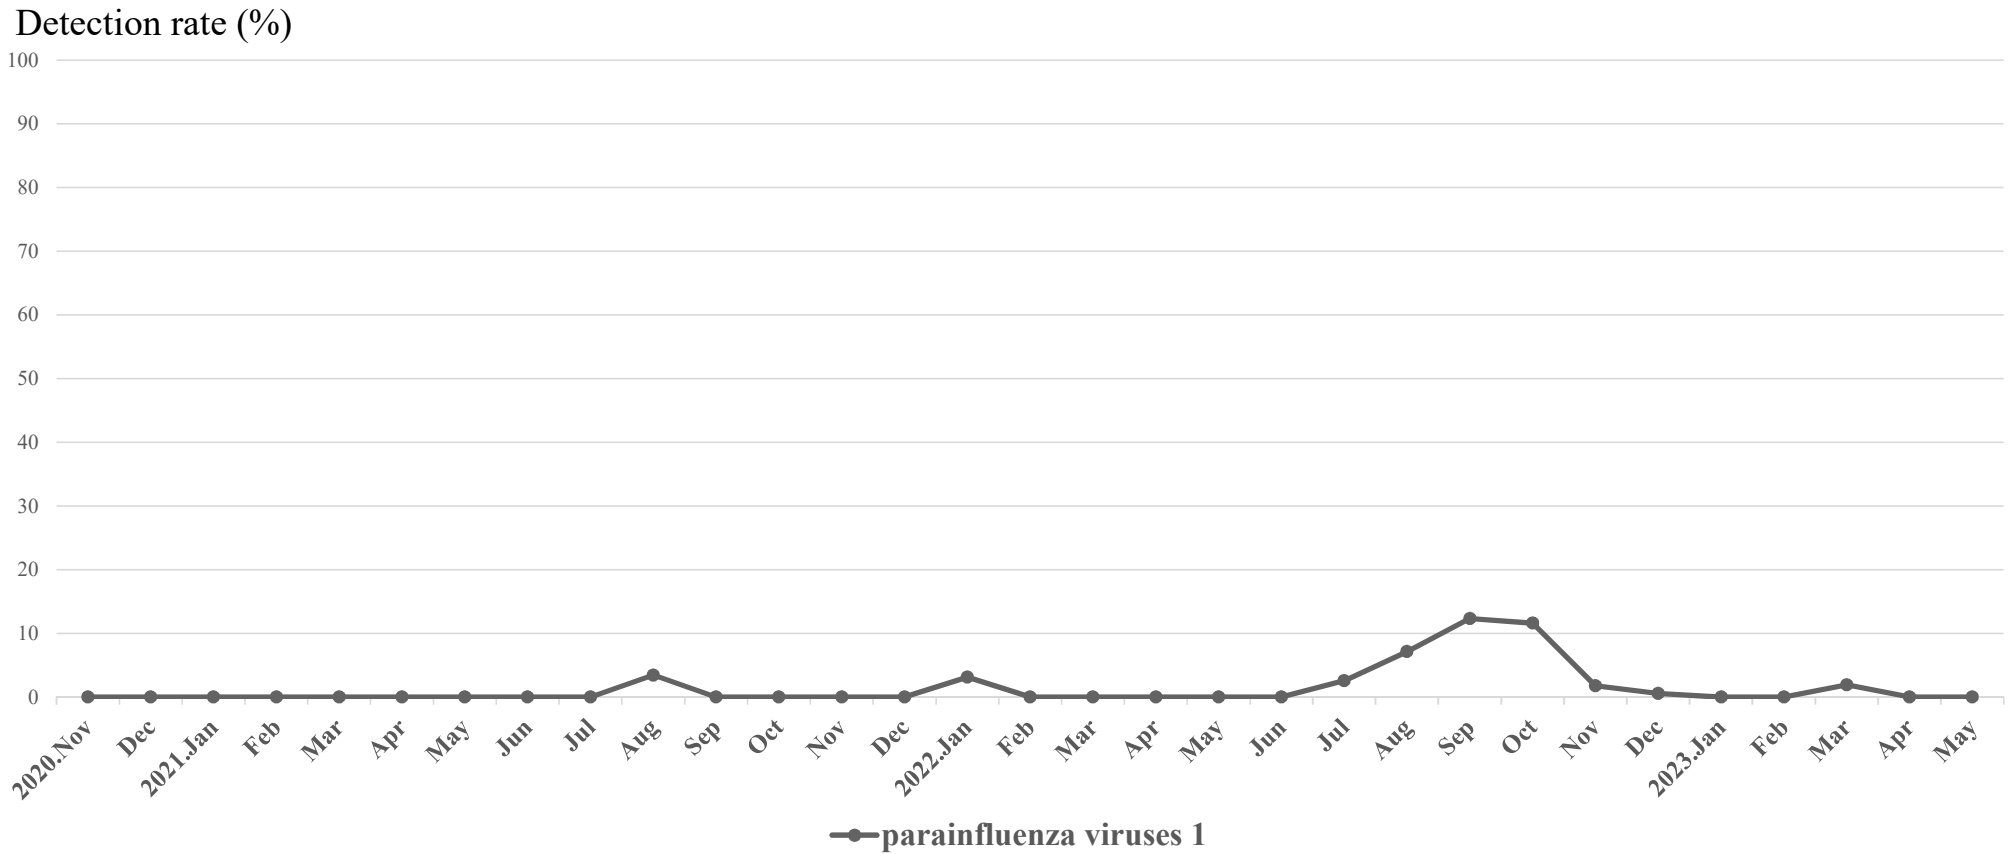

Supplement: 1349-7235-63-1683-s006.pdf [file 1349-7235-63-1683-s006.pdf]

### Supplemental Figure 7. Monthly detection rate of parainfluenza viruses 3

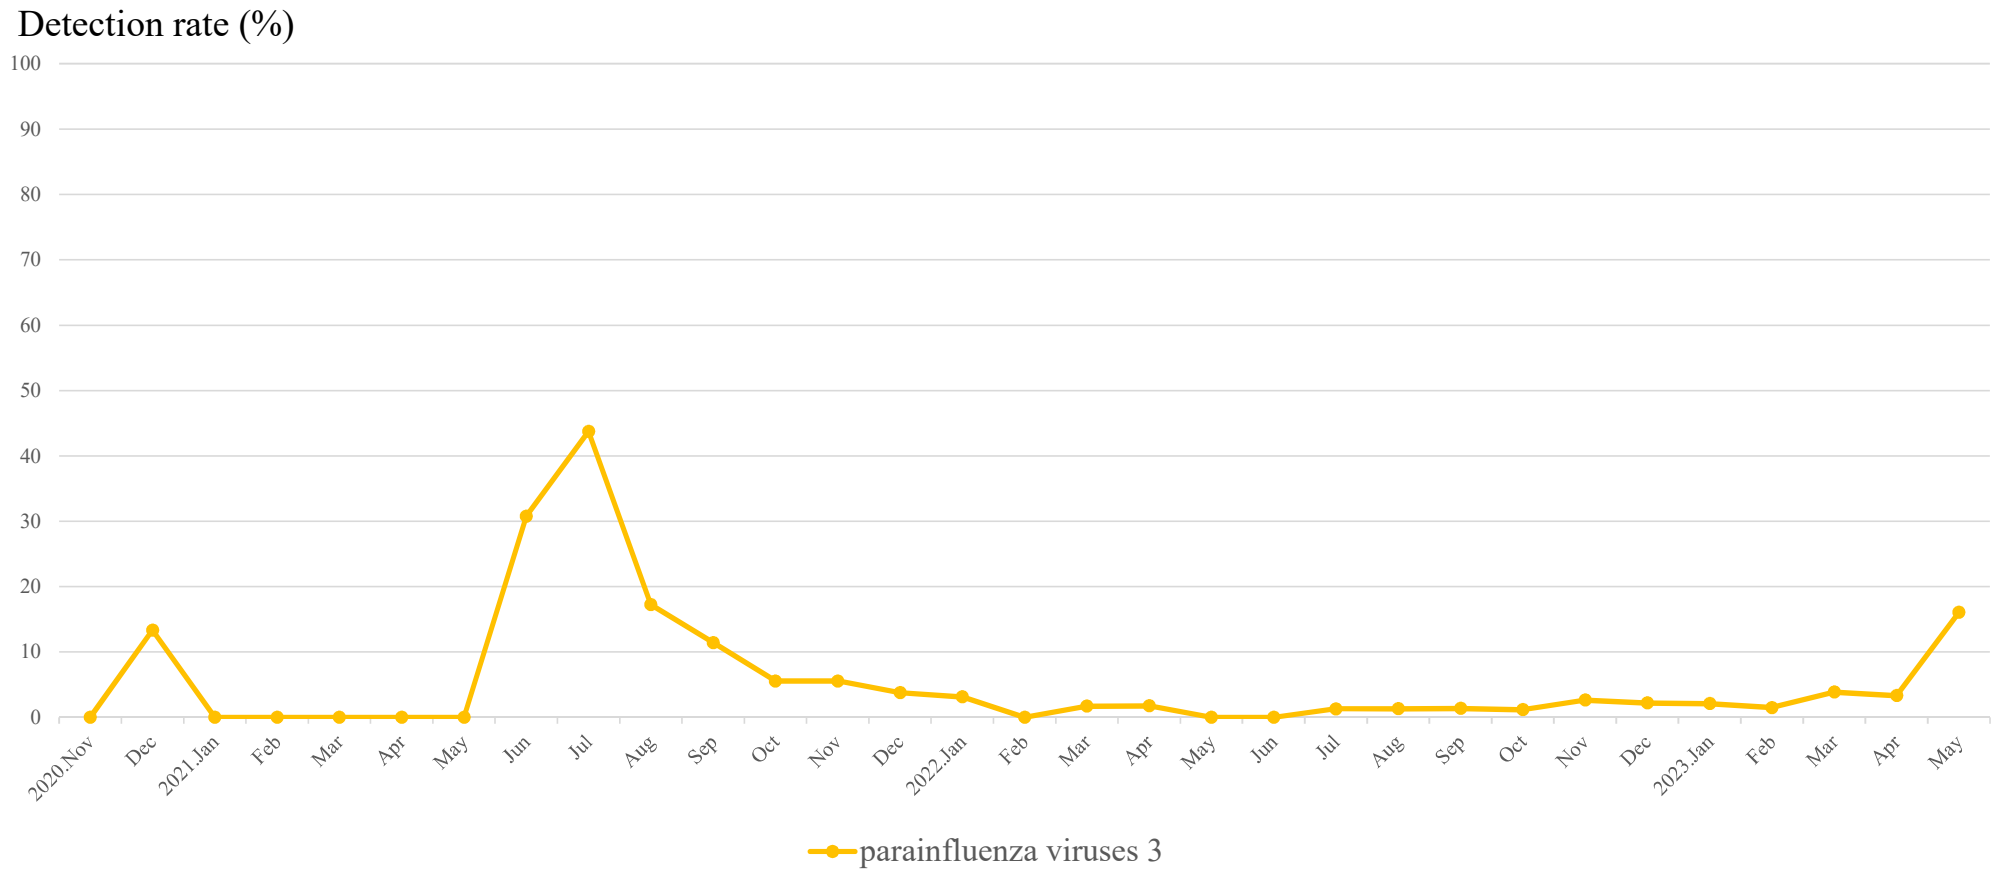

Supplement: 1349-7235-63-1683-s007.pdf [file 1349-7235-63-1683-s007.pdf]

### Supplemental Figure 8. Monthly detection rate of parainfluenza viruses 4

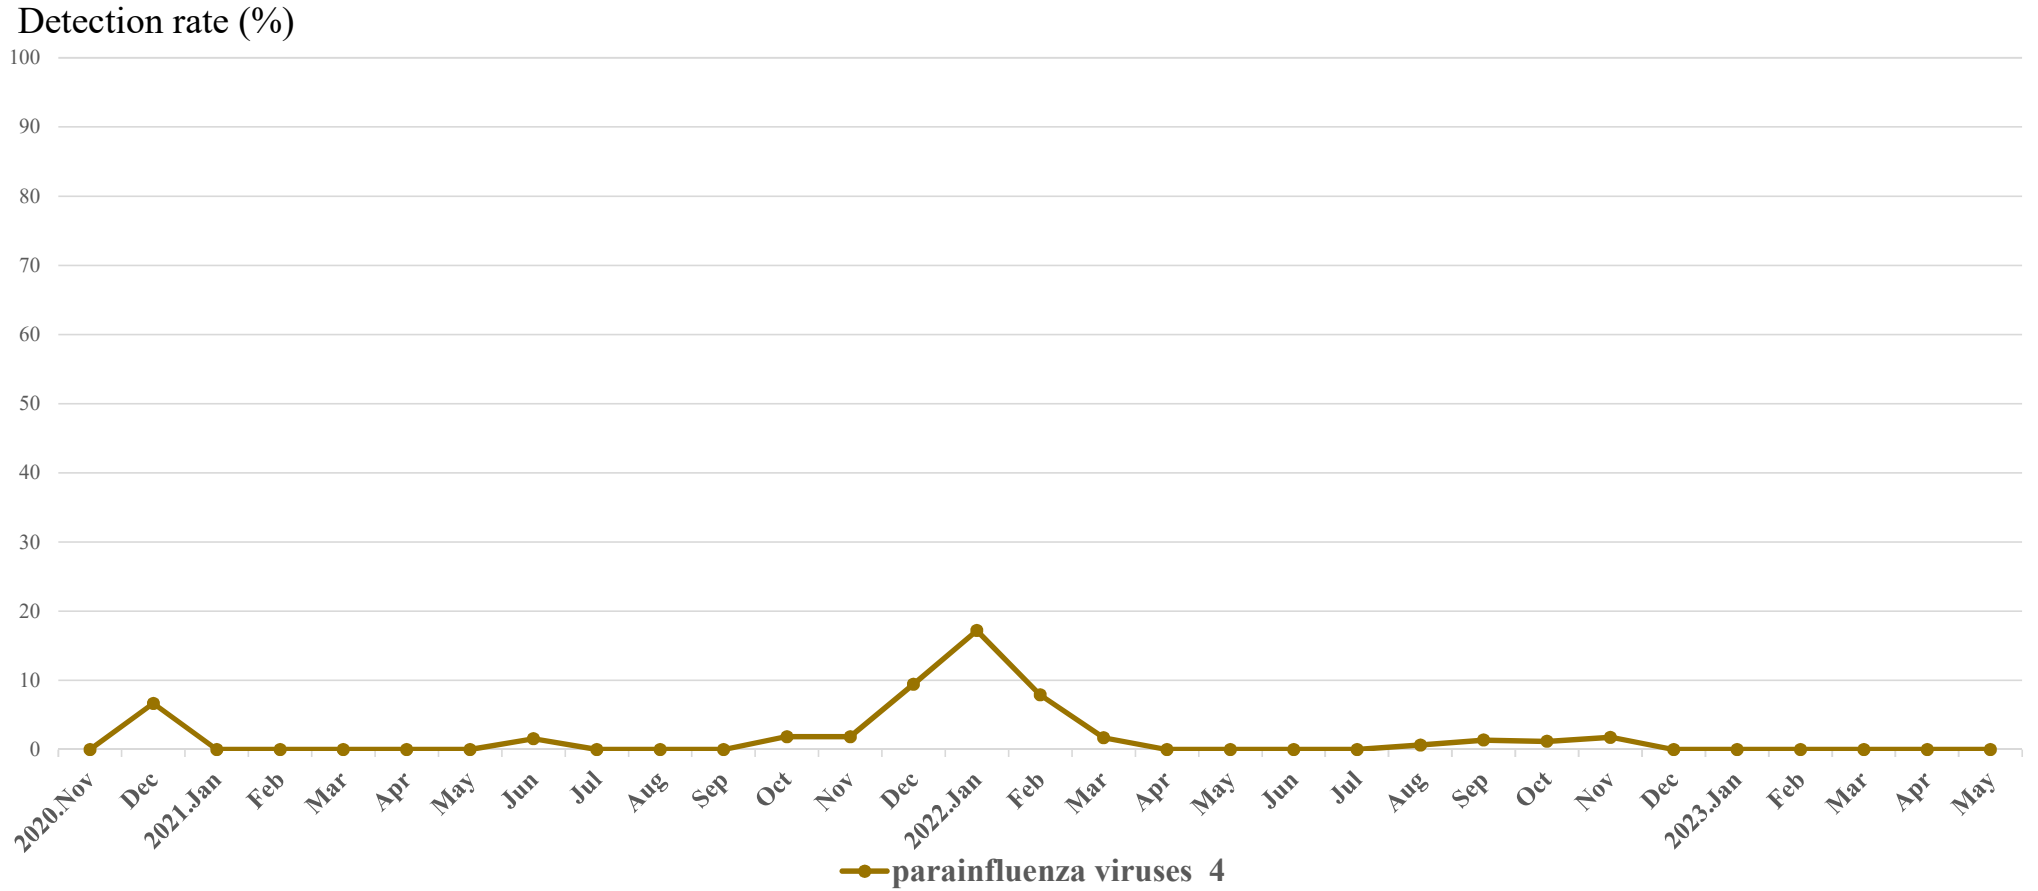

Supplement: 1349-7235-63-1683-s008.pdf [file 1349-7235-63-1683-s008.pdf]

**Supplemental Figure 9. Monthly detection rate of Coronavirus NL63**

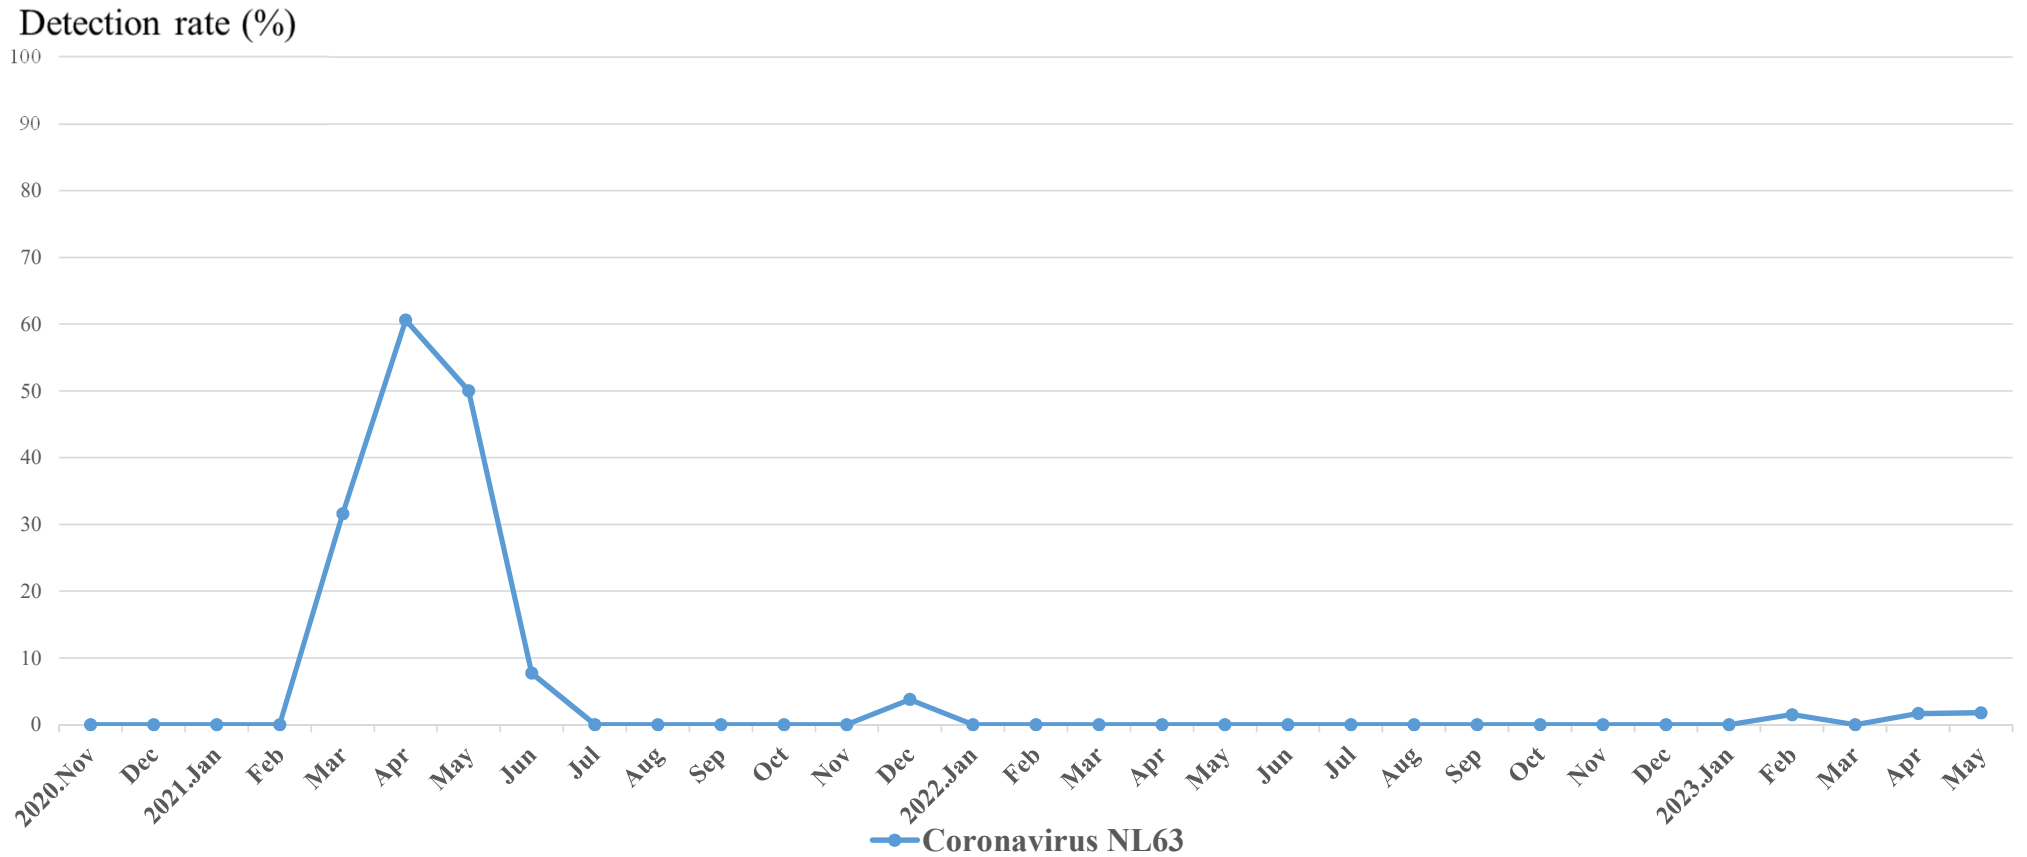

Supplement: 1349-7235-63-1683-s009.pdf [file 1349-7235-63-1683-s009.pdf]

**Supplemental Figure 10. Monthly detection rate of Coronavirus HKU 1**

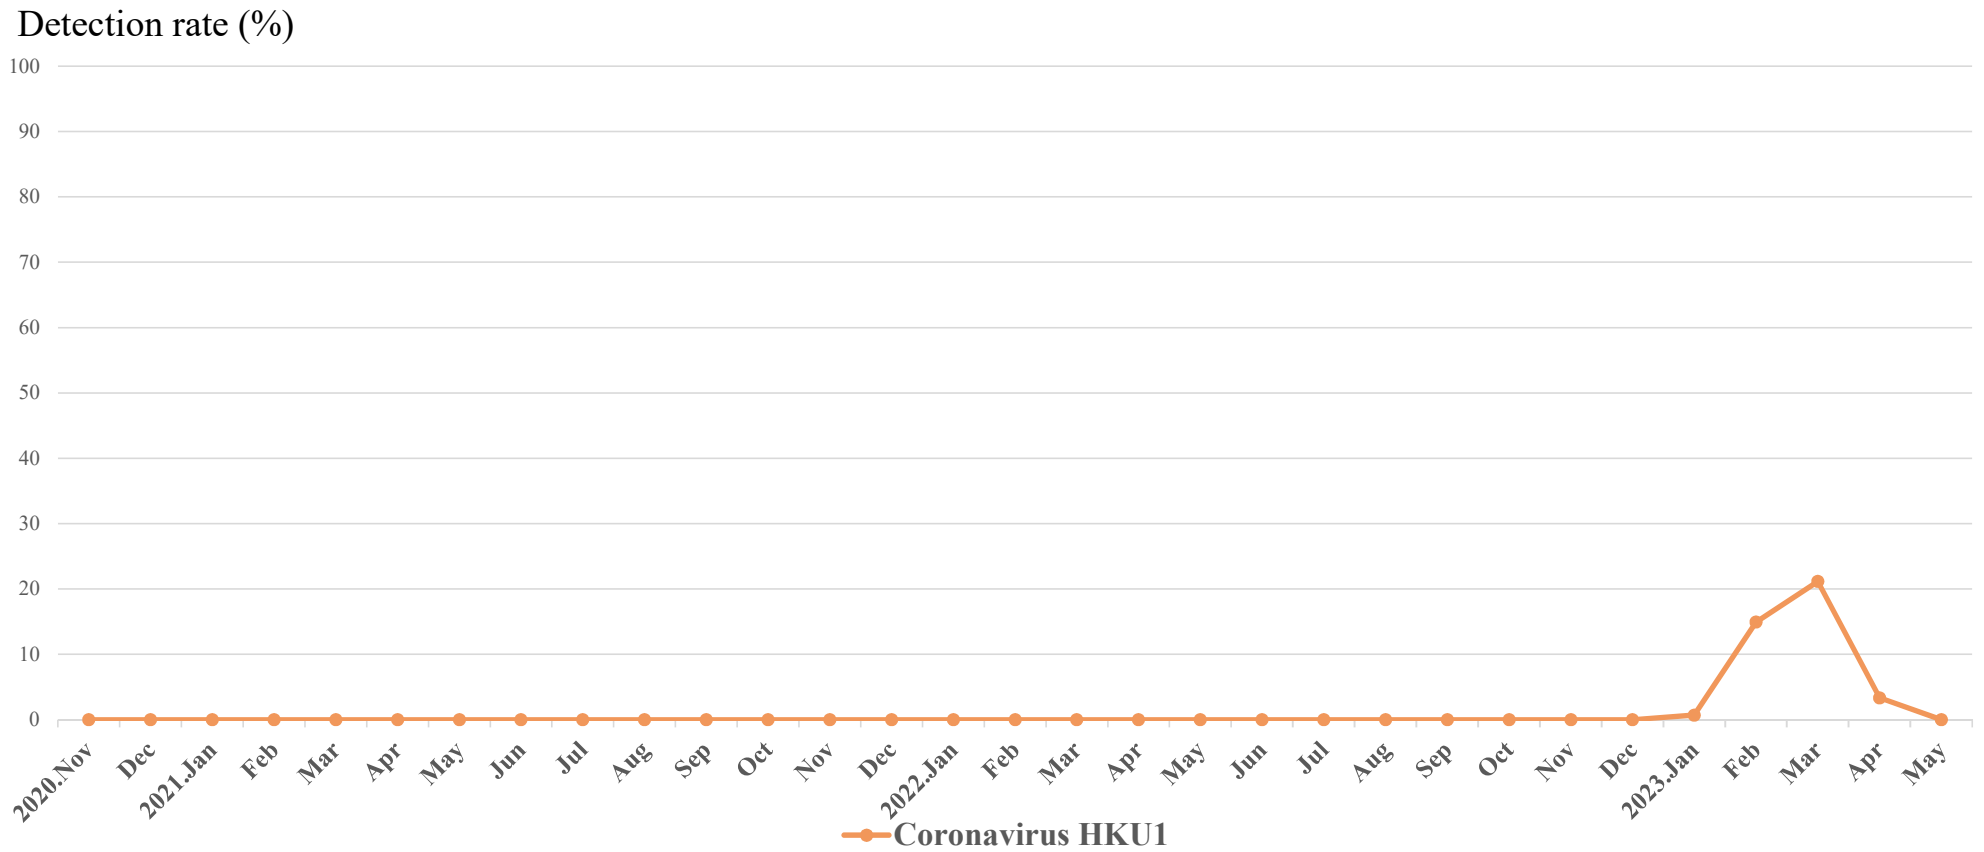

Supplement: 1349-7235-63-1683-s010.pdf [file 1349-7235-63-1683-s010.pdf]

**Supplemental Figure 11. Monthly detection rate of Coronavirus 229E**

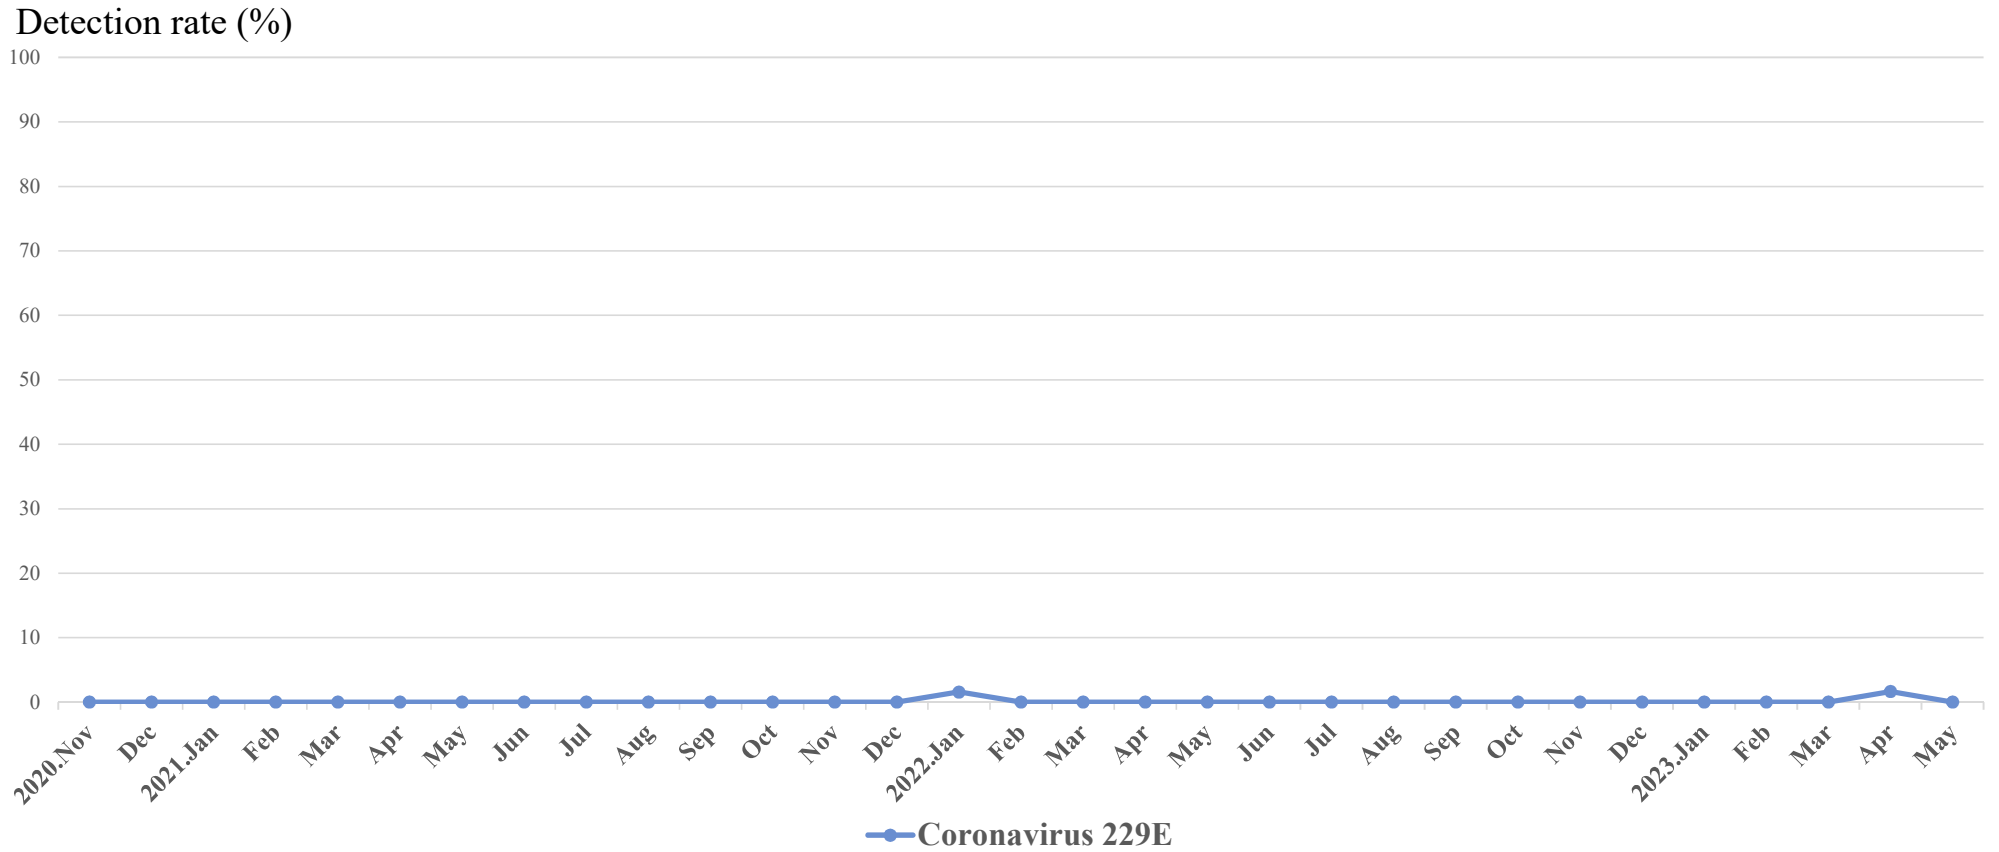

Supplement: 1349-7235-63-1683-s011.pdf [file 1349-7235-63-1683-s011.pdf]

**Supplemental Figure 12. Monthly detection rate of Coronavirus OC43**

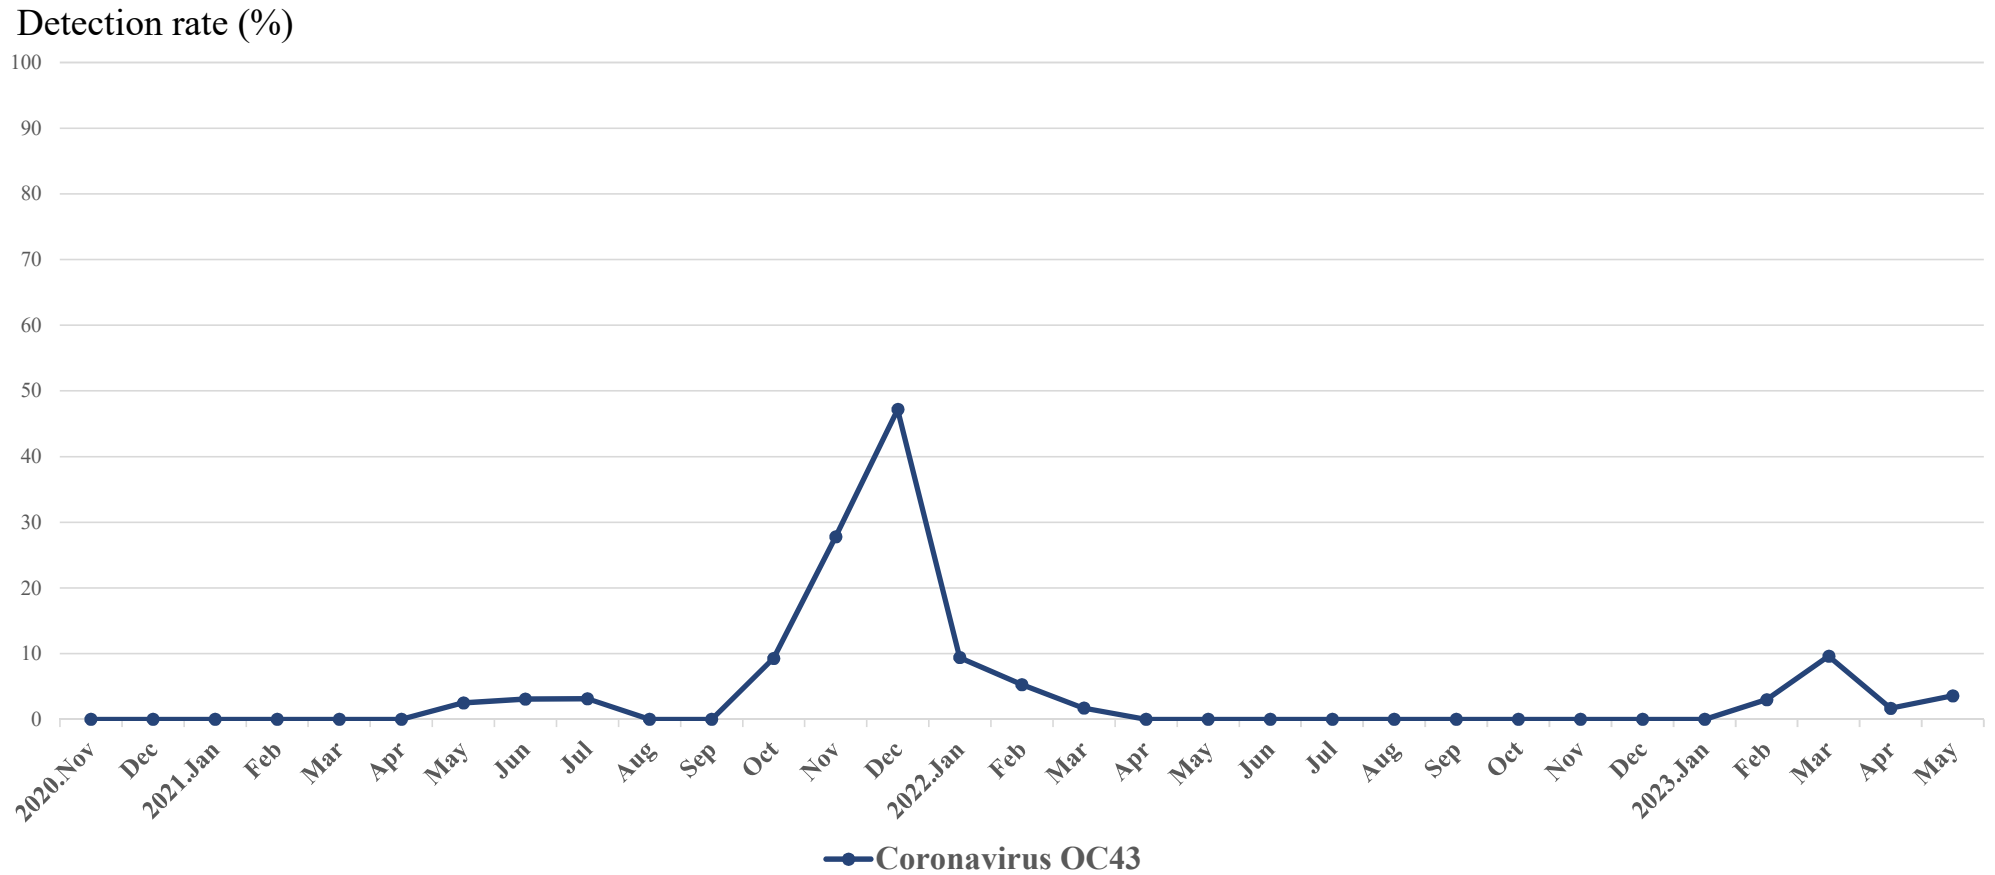

Supplement: 1349-7235-63-1683-s012.pdf [file 1349-7235-63-1683-s012.pdf]

**Supplemental Figure 13. Monthly detection rate of influenza viruses**

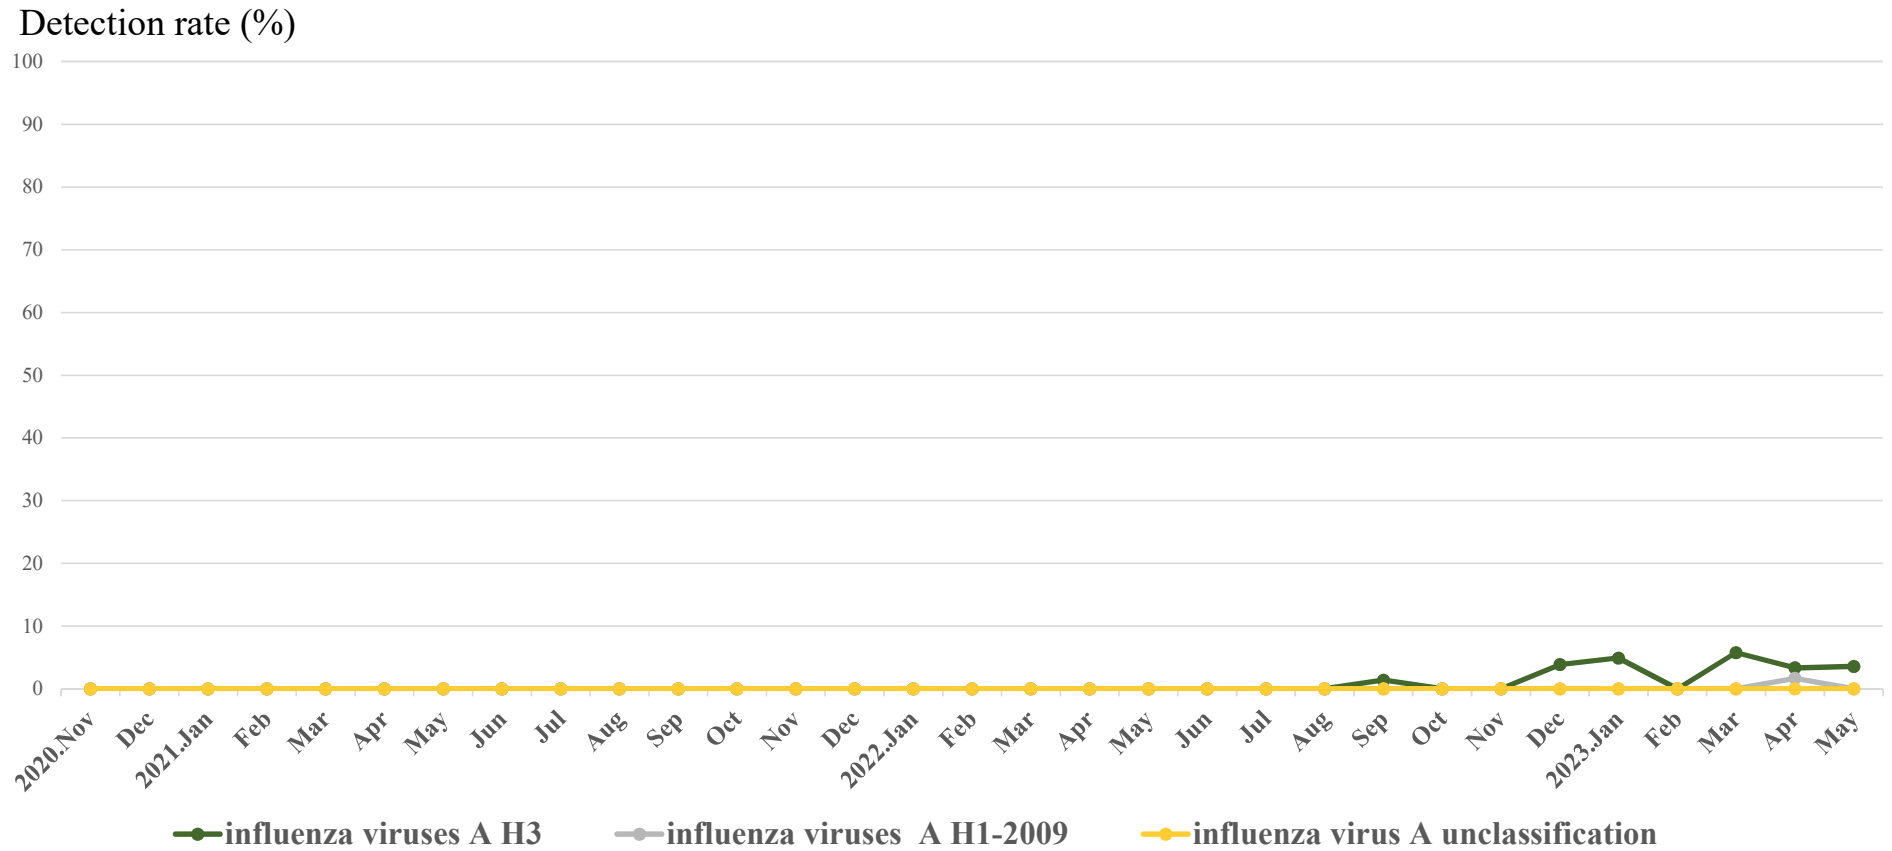

Supplement: 1349-7235-63-1683-s013.pdf [file 1349-7235-63-1683-s013.pdf]
